# Supplementary material
Source: PubMed Central journal article supplement (PMC6300631)
Supplement: 1ef315db88779d1dbab6b57bb0ba74a9_IAI.00291-18-s0001.pdf [file 1ef315db88779d1dbab6b57bb0ba74a9_IAI.00291-18-s0001.pdf]

**Supplemental Figure 1**

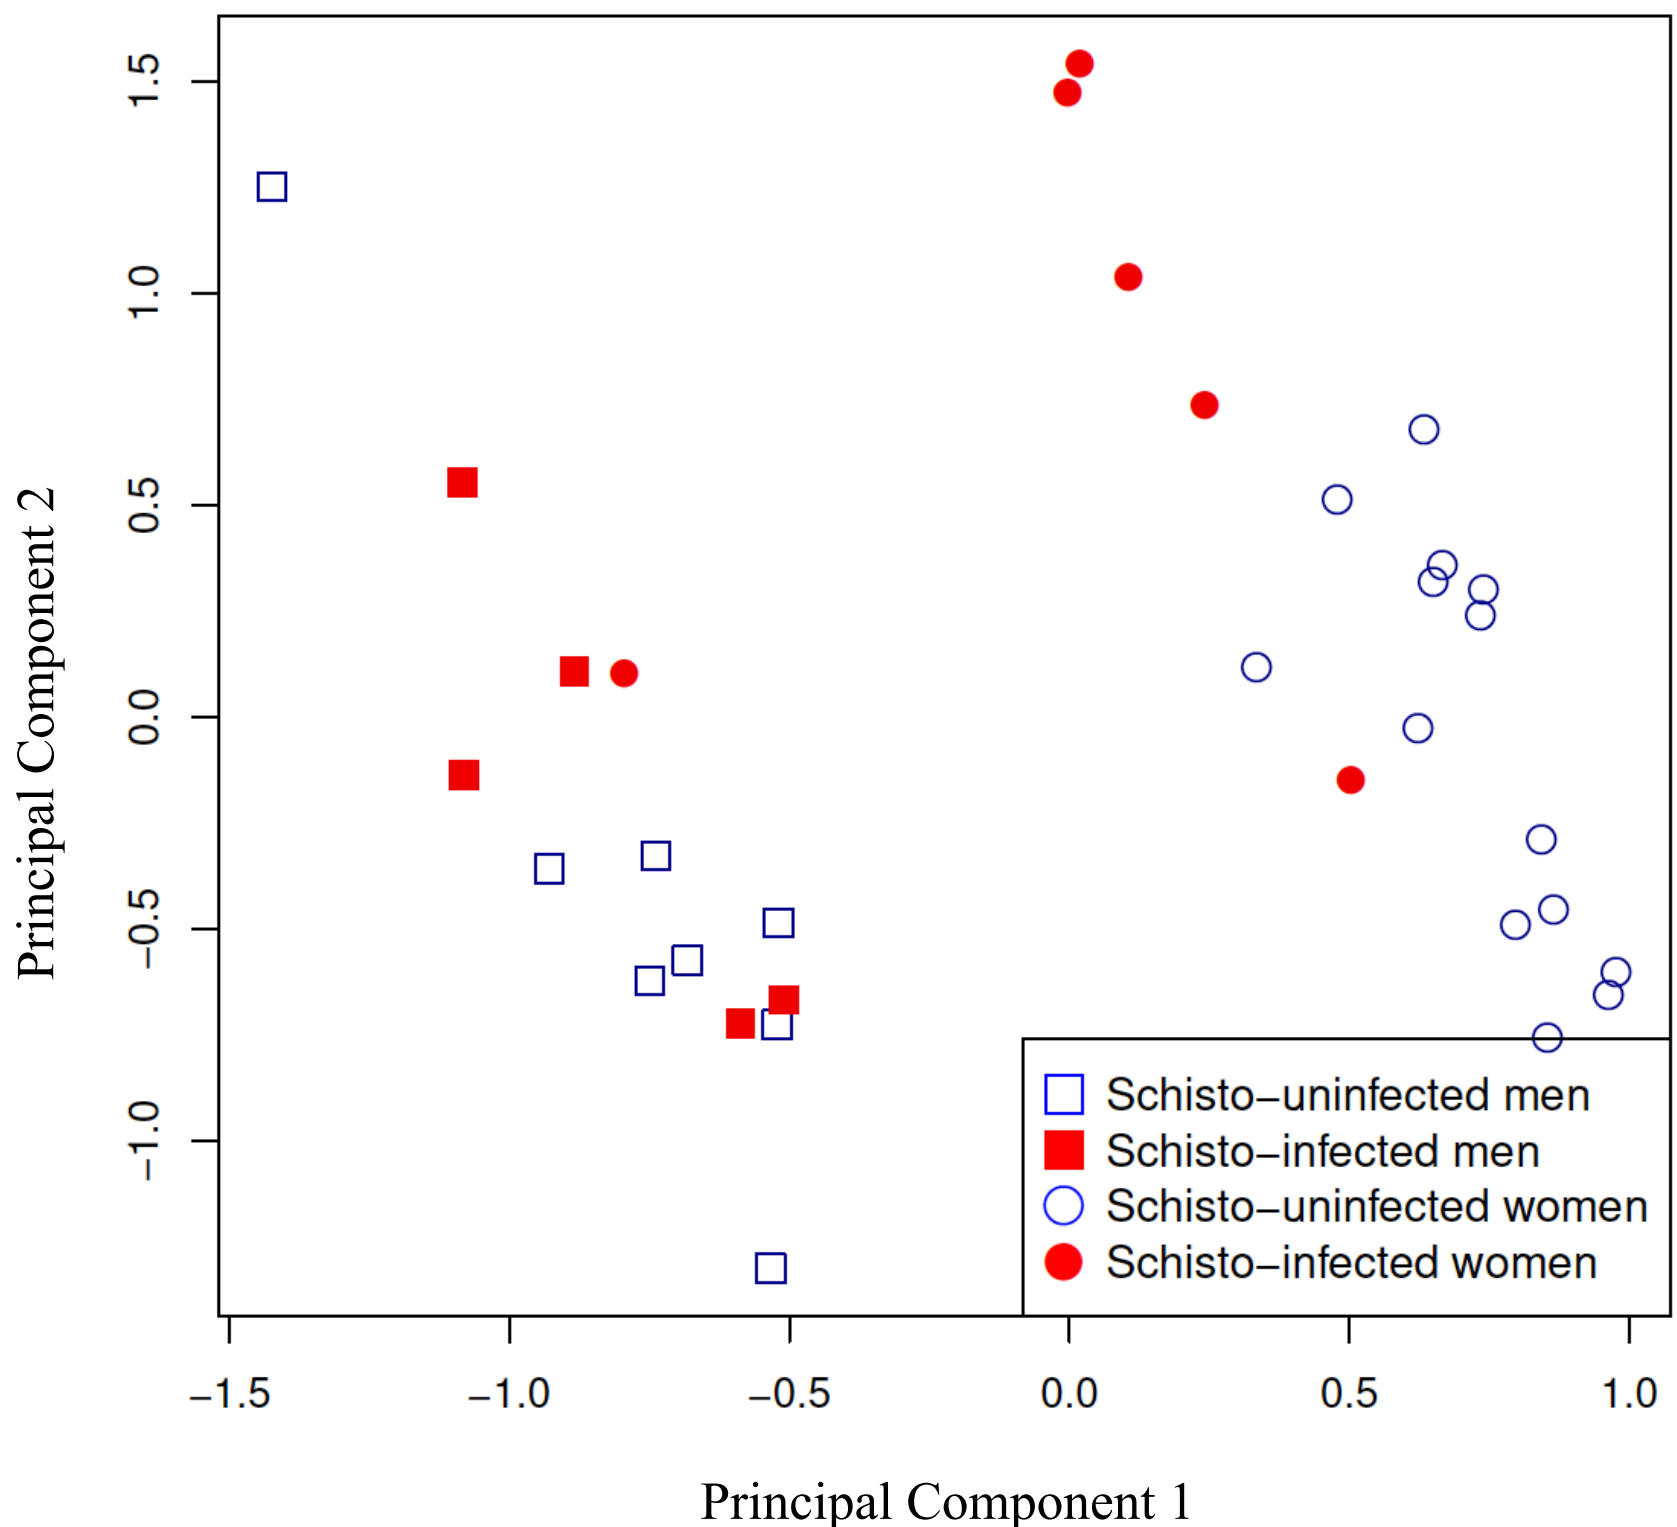

**Supplemental Figure 1. Multi-dimensional scaling plots of two-dimensional projection of differential gene expression, by sex and *S. haematobium* infection status.** This multi-dimensional scaling plot places samples on a two-dimensional scatterplot such that distances on the plot approximate the typical  $\log_2$  counts between samples. The two axes, principal component 1 and 2, represent different weighted sums of genes. PC1 and PC2 provide the best 2-dimensional summary (out of all possible combinations of weighted sums) in approximating between-sample differences in gene expression across the whole genome. The plot depicts the clear demarcation in gene expression between men (squares) and women (circles). An additional difference is noted between those with *S. haematobium* infection (filled shapes) versus those negative for schistosome infection (open shapes).

**Supplemental Table 1. The 20 statistically significant genes with greatest magnitude fold-change between those with or without *S. haematobium* infection, adjusted for sex as a co-variate.**

| <b>Gene Name</b>                                   | <b>NCBI Gene ID</b> | <b>Gene Function</b>                                                                                         | <b>Log<sub>2</sub> Fold-Change</b> | <b>Adjusted P-value</b> |
|----------------------------------------------------|---------------------|--------------------------------------------------------------------------------------------------------------|------------------------------------|-------------------------|
| Neuritin 1                                         | NRN1                | Neuron differentiation and plasticity                                                                        | +1.0                               | 0.0027                  |
| Integrin subunit alpha 7                           | ITGA7               | Cell-cell and cell-matrix interactions; cell migration, morphologic development; differentiation; metastasis | +0.88                              | 0.0027                  |
| Podocan                                            | PODN                | Inhibition of smooth muscle proliferation and migration after arterial injury                                | +0.86                              | 0.019                   |
| Cytochrome C oxidase assembly protein              | SCO2                | ATP production                                                                                               | +0.86                              | 0.019                   |
| Apical junction component 1 homolog                | AJM1 (C9orf172)     | Unknown                                                                                                      | +0.85                              | 0.023                   |
| Uroplakin 3A                                       | UPK3A               | Transmembrane protein that forms complexes on apical surface of bladder epithelium                           | +0.83                              | 0.028                   |
| TEN1-CDK3 readthrough                              | TEN1-CDK3           | Read-through transcript between TEN1 and CDK3 genes                                                          | +0.83                              | 0.019                   |
| C-type lectin domain family 1 member A             | CLEC1A              | Cell adhesion, cell-cell signaling, possibly regulating dendritic cell function                              | +0.82                              | 0.012                   |
| Glutamate ionotropic receptor NMDA type subunit 3B | GRIN3B              | Excitatory glycine receptor found primarily in motor neurons                                                 | +0.80                              | 0.028                   |
| Zinc finger protein 703                            | ZNF703              | May facilitate tumor growth and metastasis                                                                   | +0.80                              | 0.028                   |
| CD300 molecule like family member g                | CD300LG             | Cell surface glycoprotein containing an immunoglobulin (Ig) V-like domain                                    | +0.80                              | 0.023                   |
| SRY-box 15                                         | SOX15               | Transcriptional regulator, including during embryonic development                                            | +0.79                              | 0.019                   |
| Calcium voltage-gated channel                      | CACNA1A             | Subunit of a voltage-dependent calcium channel expressed                                                     | +0.79                              | 0.028                   |

|                                                  |        |                                                                                                                                                        |       |       |
|--------------------------------------------------|--------|--------------------------------------------------------------------------------------------------------------------------------------------------------|-------|-------|
| subunit alpha 1A                                 |        | predominantly in neuronal tissue                                                                                                                       |       |       |
| NDRG family member 4                             | NDRG4  | Cytoplasmic protein required for cell cycle progression and survival in astrocytes and regulation of mitotic signaling in vascular smooth muscle cells | +0.78 | 0.028 |
| FH2 domain containing 1                          | FHDC1  | Unknown                                                                                                                                                | +0.77 | 0.028 |
| Ankyrin repeat domain 9                          | ANKRD9 | Unknown                                                                                                                                                | +0.76 | 0.030 |
| Translocator protein 2                           | TSPO2  | Unknown; highly expressed in bone marrow                                                                                                               | +0.76 | 0.030 |
| Solute carrier family 1 member 7                 | SLC1A7 | Unknown                                                                                                                                                | +0.75 | 0.031 |
| Achaete-scute family bHLH transcription factor 2 | ASCL2  | Activates transcription and involved in determination of neuronal precursors in peripheral and central nervous systems                                 | +0.75 | 0.028 |
| Protein tyrosine phosphatase receptor type K     | PTPRK  | Signaling molecule that regulates cell growth, differentiation, mitotic cycle, and oncogenic transformation                                            | -0.75 | 0.023 |

\*Fold changes are expressed as *S. haematobium*-infected versus uninfected, with a positive fold-change representing increased expression in the *S. haematobium*-infected group.

**Supplemental Table 2. Primer-probe pairs used for qRT-PCR.**

| <b>Gene Name</b>                              | <b>Gene ID</b> | <b>TaqMan® Assay ID</b> |
|-----------------------------------------------|----------------|-------------------------|
| mindbomb ubiquitin ligase                     | MIB2           | Hs00373082_m1           |
| neuralized E3 ubiquitin protein ligase        | NEURL1         | Hs00410191_g1           |
| heat shock transcription factor 2             | HSF2           | Hs00988308_g1           |
| elongator acetyltransferase complex subunit 2 | ELP2           | Hs00217448_m1           |
| WD repeat domain 82                           | WDR82          | Hs00742569_s1           |
| histone deacetylase 9                         | HDAC9          | Hs01081558_m1           |
| bcl2 apoptosis regulator                      | BCL2           | Hs00608023_m1           |
| caspase 6                                     | CASP6          | Hs00154250_m1           |
| GAPDH housekeeping                            | GAPDH          | Hs03929097_g1           |
| 18S rRNA housekeeping                         | 18S            | Hs99999901_s1           |
| Beta actin housekeeping                       | ACTB           | Hs99999903_m1           |
